# Supplementary material for: Recovery-Oriented Practice in Mental Health Inpatient Settings: A Literature Review
Source: Atypon-hosted journal article supplement (doi:10.1176/appi.ps.201400469), 2016-02-29
Supplement: appi.ps.201400469.ds001.pdf [file appi.ps.201400469.ds001.pdf]

**Table 1: List of search terms used in literature search<sup>1</sup>**

| <b>1. Mental health</b> | <b>2. Inpatient settings</b> | <b>3. Recovery</b>       |
|-------------------------|------------------------------|--------------------------|
| mental health* OR       | inpatient* OR inpatient      | recover* OR recovery* OR |
| psychiatry* OR mental   | care* OR bed patient* OR     | recovery-oriented* OR    |
| illness* OR mental      | inpatient ward* OR           | recovery oriented*       |
| disorder* OR mental     | inpatient unit* OR inpatient |                          |
| disease* OR mental      | hospital* OR state           |                          |
| problem* OR psychiatric | hospital* OR state hospital  |                          |
| service*                | ward* OR state hospital      |                          |
|                         | unit* OR acute care* OR      |                          |
|                         | acute ward* OR acute unit*   |                          |

---

<sup>1</sup> The terms in each of the columns were used in three different searches. First we searched with the terms from column 1, followed by a search with the terms from column 2, and so forth. They were all combined with AND in a final search.

**Figure 1: Flowchart of systematic literature search<sup>2</sup>**

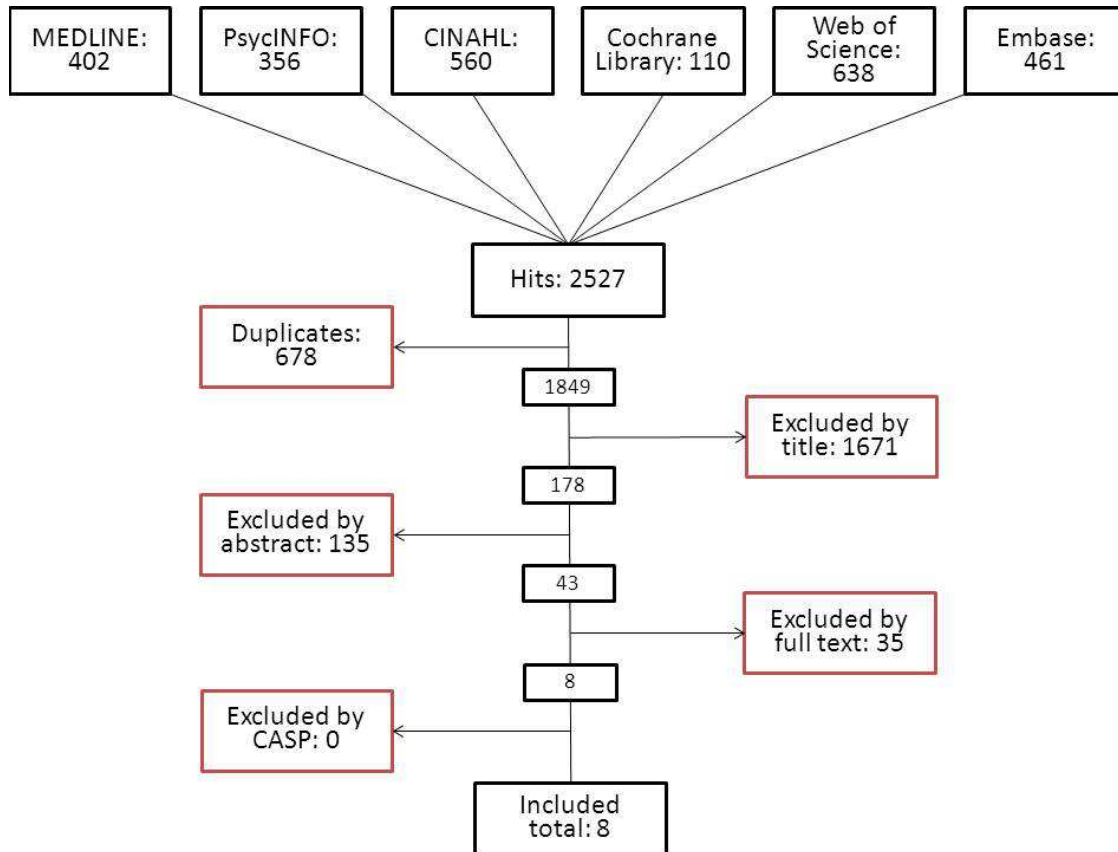

<sup>2</sup> From top of the flowchart: The search results from each of the databases used for literature search are shown in the top boxes. This amounted to 2527 hits in total, of which 678 were duplicates. We proceeded to read the titles and excluded 1671 studies. Then we read the abstracts and excluded an additional 135. From here we proceeded to read the entire text of the remaining studies and excluded 35. This left us with 8 studies, which we assessed using CASP.
